# Supplementary material for: Controlled synthesis of graphene–Gd(OH)3 nanocomposites and their application for detection of ascorbic acid
Source: Royal Society of Chemistry journal article supplement (doi:10.1039/c5ra00064e), 2015-01-01
Supplement: c5ra00064e1.pdf [file c5ra00064e1.pdf]

## Supporting Information

Controlled Synthesis of Graphene-Gd(OH)<sub>3</sub> Nanocomposites and Their Applications for Detection  
of Ascorbic Acid

Hong Ruan, Baoyong Liu, Hongguang Li

Laboratory of Clean Energy Chemistry and Materials, Lanzhou Institute of Chemical Physics,  
Chinese Academy of Sciences, Lanzhou 730000, China

\*E-mail: [hgli@licp.cas.cn](mailto:hgli@licp.cas.cn)

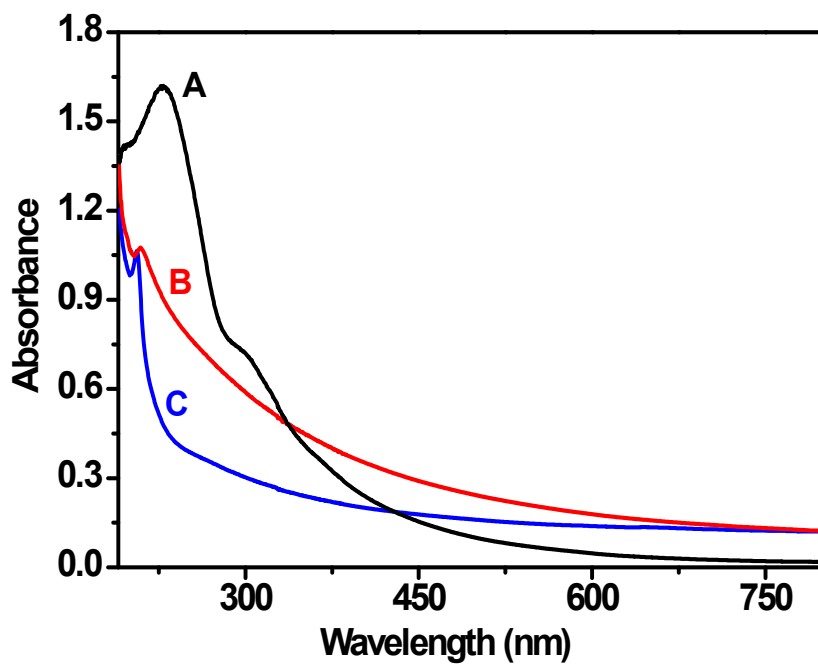

Fig. S1. UV-vis spectra of GO (A), GR-Gd(OH)<sub>3</sub>-1 (B) and GR-Gd(OH)<sub>3</sub>-2 (C).

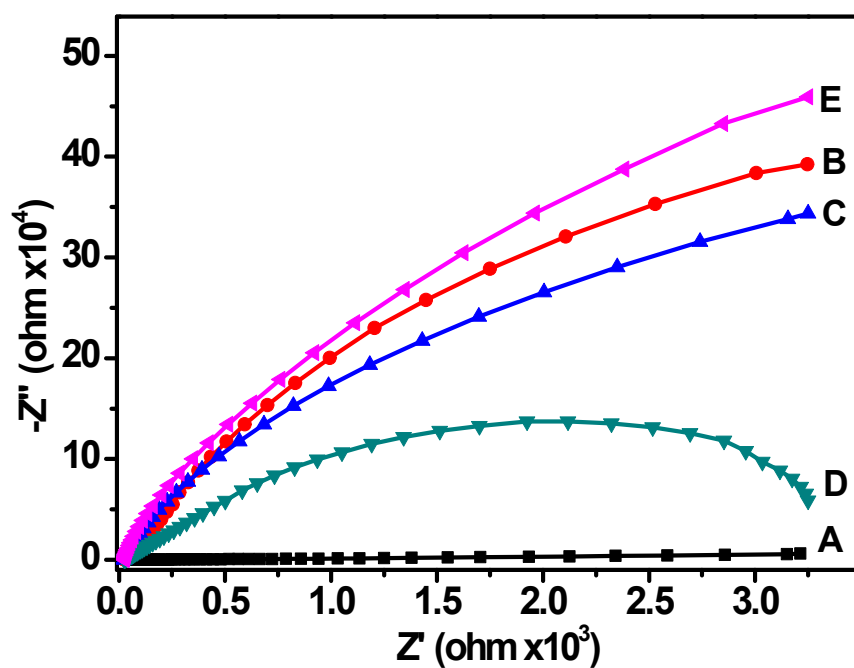

Fig. S2. EIS of GCE/GR (A), GCE/Gd(OH)<sub>3</sub> (B), GCE/GR-Gd(OH)<sub>3</sub>-1 (C), GCE/GR-Gd(OH)<sub>3</sub>-2 (D) and bare GCE (E) in 0.1 M PBS-0.5 mM AA aqueous solution recorded in the frequency range of 0.0-4.0 x 10<sup>4</sup> Hz.

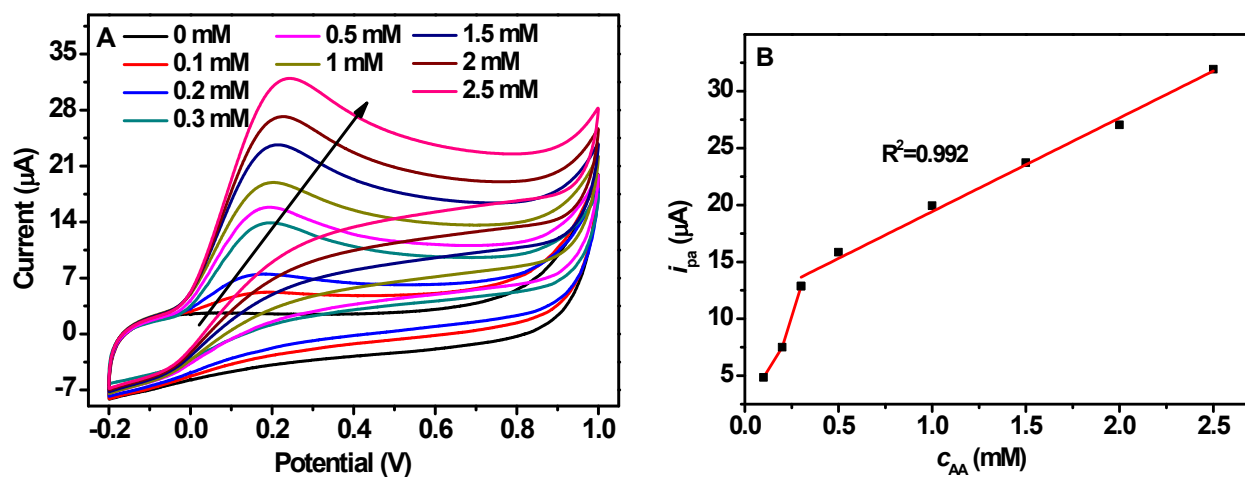

**Fig. S3** A) CV of GCE/GR-Gd(OH)<sub>3</sub>-2 in 0.1 M PBS (pH = 7.0) at varying concentration of AA (0.1-2.5 mM) and B) the relationship between  $i_{pa}$  and  $c_{AA}$ .

Holding the potential of oxidation peak at 0.185 V with the  $c_{AA}$  ranged from 0.3-2.5mM, a linear relationship between  $i_{pa}$  and  $c_{AA}$  was found. The resulting calibration plot is a straight line, with a coefficient of 0.992, given by the equation:

$$i_{pa}(\mu A) = 8.23c_{AA}(\text{mM}) + 11.19 \quad (\text{S1})$$

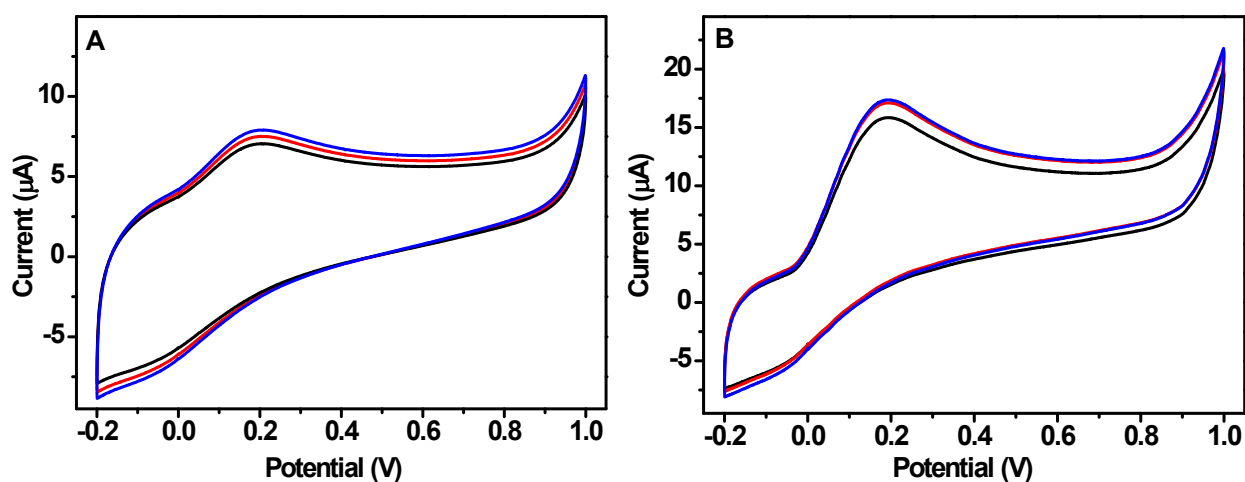

**Fig. S4** CV curves of GCE/GR-Gd(OH)<sub>3</sub>-1 (A) and GCE/GR-Gd(OH)<sub>3</sub>-2 (B) in 0.1 M PBS with 0.5mM AA at 100 mV s<sup>-1</sup>. In each case the measurements were performed for three times to check the reproducibility.

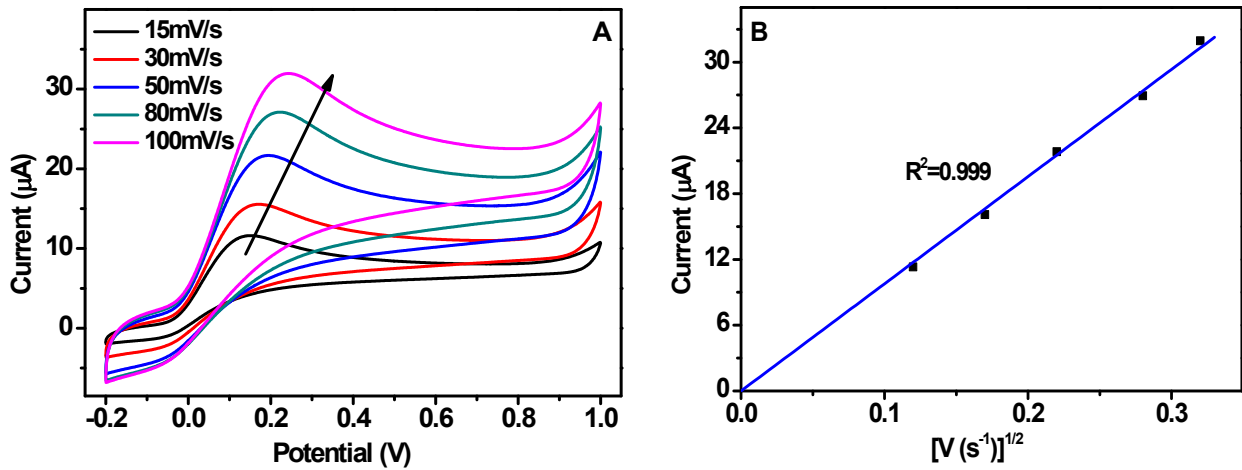

**Fig. S5** (A) CV of GCE/GR-Gd(OH)<sub>3</sub>-2 in 2.5 mM AA aqueous solution at varying scan rate (15-100 mV/s) and (B) the relationship between  $i_{pa}$  and  $V^{1/2}$ .

**Table S1.** BET specific surface area ( $S_{BET}$ ) and total pore volume of Gd(OH)<sub>3</sub>, GR-Gd(OH)<sub>3</sub>-1 and GR-Gd(OH)<sub>3</sub>-2.

| Sample                                                | Gd(OH) <sub>3</sub> | GR-Gd(OH) <sub>3</sub> -1 | GR-Gd(OH) <sub>3</sub> -2 |
|-------------------------------------------------------|---------------------|---------------------------|---------------------------|
| $S_{BET}$ (m <sup>2</sup> ·g <sup>-1</sup> )          | 3.23                | 18.02                     | 32.38                     |
| Total pore volume (cm <sup>3</sup> ·g <sup>-1</sup> ) | 0.29                | 0.36                      | 0.41                      |

### Calculation of the lowest limit of detection (LOD)

The LOD of GCE/GR-Gd(OH)<sub>3</sub>-1 and GCE/GR-Gd(OH)<sub>3</sub>-2 can be calculated to be 0.06 mM and 0.05 mM, respectively. Nine blank experiments of GCE/GR-Gd(OH)<sub>3</sub>-1 and GCE/GR-Gd(OH)<sub>3</sub>-2 were carried out in 0.1 M PBS without AA, from which nine oxidation peak currents were obtained. Then LOD of modified GCE can be calculated by the equations shown below (based on S/N=3) :

$$SD = \sqrt{\frac{\sum (x_i - \bar{x})^2}{n-1}}$$

$$LOD = \frac{3SD}{s}$$

where  $x_i$  is the oxidation peak current of the nine experiments,  $\bar{x}$  is the averaged value of  $x_i$ ,  $n$  is the times of experiments. SD is standard deviation.  $s$  is the slope determined by the curves of a linear relationship between  $i_{pa}$  and  $c_{AA}$  of electrodes. Taking the calculation process of LOD of GCE/GR-Gd(OH)<sub>3</sub>-1 for example,  $s$  is 7.34, determined by equation 1 shown in the maintext. The detailed calculation of the LOD is as bellow:

| $x_1/\mu A$ | $x_2/\mu A$ | $x_3/\mu A$ | $x_4/\mu A$ | $x_5/\mu A$ | $x_6/\mu A$ | $x_7/\mu A$ | $x_8/\mu A$ | $x_9/\mu A$ | $\bar{x} / \mu A$ |
|-------------|-------------|-------------|-------------|-------------|-------------|-------------|-------------|-------------|-------------------|
| 2.683       | 2.598       | 2.817       | 2.528       | 2.833       | 2.741       | 2.479       | 2.475       | 2.849       | 2.667             |

### Calculation of the relative standard deviation (RSD)

Taking the calculated method of RSD of GCE/GR-Gd(OH)<sub>3</sub>-1 for example, the detailed calculation is shown below:

$$SD = \sqrt{\frac{\sum (x_i - \bar{x})^2}{n-1}}$$

$$RSD = \frac{SD}{\bar{x}} = \frac{\sqrt{\frac{\sum (x_i - \bar{x})^2}{n-1}}}{\bar{x}}$$

where  $x_i$  is the oxidation peak current of GCE/GR-Gd(OH)<sub>3</sub>-1,  $\bar{x}$  is the averaged value of  $x_i$ ,  $n$  is the number of the experiment, SD is the standard deviation.

| $x_1/\mu\text{A}$ | $x_2/\mu\text{A}$ | $x_3/\mu\text{A}$ | $\bar{x}/\mu\text{A}$ |
|-------------------|-------------------|-------------------|-----------------------|
| 7.511             | 7.902             | 7.045             | 7.486                 |
